# Supplementary material for: Occurrence of twin embryos in the eastern bluebird
Source: PeerJ. 2014 Mar 11;2:e273. doi: 10.7717/peerj.273 (PMC3961165; doi:10.7717/peerj.273)
Supplement: Supplemental Information 1 [file peerj-02-273-s001.xlsx]

## Sheet: Site Visits
Species	Date	Time	Host Eggs	Host Live Young	Host Dead Young	Nest Status	Young Status	Management Activity	Observer Initials
Eastern Bluebird	2013-06-17	6:47 PM	4	0	0	New avian nest found	No young present	No management activity	GC
Eastern Bluebird	2013-06-27	unrecorded	4	0	0	Completed nest	No young present	No management activity	GC
Eastern Bluebird	2013-06-28	unrecorded	4	0	0	Completed nest	No young present	No management activity	GC
Eastern Bluebird	2013-06-29	unrecorded	4	0	0	Completed nest	No young present	No management activity	GC
Eastern Bluebird	2013-06-30	unrecorded	4	0	0	Completed nest	No young present	No management activity	GC
Eastern Bluebird	2013-07-01	16:30:00	1	4	0	Completed nest	Hatching young	No management activity	GC
Eastern Bluebird	2013-07-02	11:50:00	0	5	0	Completed nest	Naked young	No management activity	GC
Eastern Bluebird	2013-07-03	19:42:00	0	5	0	Completed nest	Naked young	No management activity	GC
Eastern Bluebird	2013-07-04	9:04 AM	0	5	0	Completed nest	Naked young	No management activity	GC
Eastern Bluebird	2013-07-05	09:42:00	0	5	0	Completed nest	Partially feathered	No management activity	GC
Eastern Bluebird	2013-07-06	19:36:00	0	5	0	Completed nest	Partially feathered	No management activity	GC
Eastern Bluebird	2013-07-07	13:56:00	0	5	0	Completed nest	Partially feathered	No management activity	GC
Eastern Bluebird	2013-07-08	09:58:00	0	5	0	Completed nest	Partially feathered	No management activity	GC
Eastern Bluebird	2013-07-09	18:47:00	0	5	0	Completed nest	Partially feathered	No management activity	GC
Eastern Bluebird	2013-07-10	13:06:00	0	5	0	Completed nest	Partially feathered	No management activity	GC
Eastern Bluebird	2013-07-11	15:48:00	0	3	2	Completed nest	Partially feathered	No management activity	GC
Eastern Bluebird	2013-07-12	10:30:00	0	3	0	Completed nest	Partially feathered	No management activity	GC
Eastern Bluebird	2013-07-13	18:12:00	0	3	0	Flattened nest with fecal matter	Partially feathered	No management activity	GC
Eastern Bluebird	2013-07-15	19:54:00	0	3	0	Flattened nest with fecal matter	Fully feathered young	No management activity	GC
Eastern Bluebird	2013-07-16	5:27 PM	0	3	0	Flattened nest with fecal matter	Fully feathered young	No management activity	GC
Eastern Bluebird	2013-07-18	16:44:00	0	3	0	Flattened nest with fecal matter	Fully feathered young	No management activity	GC
Eastern Bluebird	2013-07-20	8:36 AM	0	2	0	Flattened nest with fecal matter	Fully feathered young	No management activity	GC
Eastern Bluebird	2013-07-21	19:02:00	0	0	0	Flattened nest with fecal matter	No young present	No management activity	GC
